# Supplementary material
Source: publisher site journal article supplement (https://www.dovepress.com/article/423152)
Supplement: Supplementary file 1 [file get_supplementary_file.php]

Appendix 1. Loadings of measurement items

| Construct and measurement items | Item loading | Reference |
| --- | --- | --- |
| Availability of social support (AS) |  | Xiao (1) |
| AS01 | 0.821 |
| AS02 | 0.880 |
| AS03 | 0.863 |
| Emotional intelligence (EI) |  | Wong and Law (2) |
| EI01 | 0.829 |
| EI02 | 0.838 |
| EI03 | 0.758 |
| EI04 | 0.791 |
| EI05 | 0.845 |
| EI06 | 0.781 |
| EI07 | 0.822 |
| Active coping (AC) |  | Xie (3) |
| AC01 | 0.830 |
| AC02 | 0.806 |
| AC03 | 0.683 |
| AC04 | 0.832 |
| AC05 | 0.803 |
| AC06 | 0.755 |
| Self-efficacy (SE) |  | Schwarzer, Bassler (4) |
| SE01 | 0.799 |
| SE02 | 0.718 |
| SE03 | 0.779 |
| SE04 | 0.801 |
| SE05 | 0.803 |
| SE06 | 0.775 |
| Psychological resilience (PR) |  | Connor and Davidson (5); Campbell-Sills and Stein (6) |
| PR01 | 0.824 |
| PR02 | 0.807 |
| PR03 | 0.709 |
| PR04 | 0.813 |
| PR05 | 0.713 |
| PR06 | 0.887 |
| PR07 | 0.717 |
| PR08 | 0.798 |
| PR09 | 0.778 |
| PR10 | 0.779 |
| Expatriate performance (EA) |  | Black and Stephens (7) |
| EA01 | 0.761 |
| EA02 | 0.733 |
| EA03 | 0.693 |
| EA04 | 0.735 |
| EA05 | 0.780 |
| EA06 | 0.814 |
| EA07 | 0.783 |
| EA08 | 0.754 |
| EA09 | 0.753 |

**Reference in the appendix**

1. Xiao SY. The theoretical basis and research application of Social Support Rating Scale. Journal of Clinical Psychiatry. 1994;4(2):98-100.

2. Wong C-S, Law KS. Wong and law emotional intelligence scale. The Leadership Quarterly. 2002.

3. Xie Y. Reliability and validity of the simplified Coping Style Questionnaire. Chinese Journal of Clinical Psychology. 1998(2):114-5.

4. Schwarzer R, Bassler J, Kwiatek P, Schroder K, Zhang JAX. The assessment of optimistic self-beliefs: Comparison of the German, Spanish, and Chinese versions of the general self-efficacy scale. Applied Psychology-an International Review-Psychologie Appliquee-Revue Internationale. 1997;46(1):69-88.

5. Connor KM, Davidson JR. Development of a new resilience scale: the Connor-Davidson Resilience Scale (CD-RISC). Depress Anxiety. 2003;18(2):76-82.

6. Campbell-Sills L, Stein MB. Psychometric analysis and refinement of the Connor-davidson Resilience Scale (CD-RISC): Validation of a 10-item measure of resilience. J Trauma Stress. 2007;20(6):1019-28.

7. Black JS, Stephens GK. The Influence of the Spouse on American Expatriate Adjustment and Intent to Stay in Pacific Rim Overseas Assignments. J Manage. 1989;15(4):529-44.
